# Supplementary material for: Co-translational assembly orchestrates competing biogenesis pathways
Source: Springer Nature journal article supplement (doi:10.1038/s41467-022-28878-5), 2022-03-09
Supplement: MOESM1 [file 41467_2022_28878_MOESM1_ESM.pdf]

# **Supplementary Information**

## **Co-translational assembly orchestrates competing biogenesis pathways**

Seidel et al.

## Supplementary Note

### Factors controlling success and failure in complex assembly

#### Kinetic model of complex assembly

The modeling of the assembly kinetics of protein complexes is complicated by the large set of possible intermediates and the associated competition between functional assembly and aggregation. In detailed models of the binding and dissociation kinetics of the assembly process, one typically ends up with large sets of coupled bimolecular rate equations that jointly describe the individual association events between the different functional and non-functional intermediates. In the latter, a diverse set of nonspecific factors  $X$  compete with the actual components of the complex. As further challenge, such a kinetic model requires extensive parametrization and needs to be solved numerically. Moreover, the model is necessarily specific to a particular assembly under certain conditions, and therefore not easily interpretable in a more general context.

Here, we instead construct a general model that, in steady state, captures the essence of the process under relatively mild assumptions. With this model, we then ask how failures in the assembly at intermediate steps accumulate and how this impacts the overall assembly success. Consider a complex composed of  $N$  individual proteins. We lump all assembly intermediates containing  $n$  of the  $N$  proteins in a correct arrangement together into a state  $n$ . Given such an intermediate, we consider three possibilities: (1) the assembly expands and transitions to a state with  $n+1$  of the  $N$  proteins in a correct arrangement; (2) the assembly enters an aggregate; and (3) the assembly fragments. For simplicity, we here assume that a single protein falls off in fragmentation, resulting in a state  $n-1$ . In steady state, we can then specify probabilities  $p_n$  and  $q_{n-1}$  for an assembly of size  $n$  to expand and to fragment, respectively, as the relative fractions of times these events occur. The remainder,  $r_n=1-p_n-q_{n-1}$ , is then the probability to aggregate from state  $n$ . These sets of probabilities determine the assembly success and the build-up of aggregates (**Supplementary Fig. 1a**).

Given these probabilities, we can quantify the fraction of successful assembly processes. We define  $f_i$  as the probability to proceed from a fully dissociated state ( $n=1$ ) to the fully assembled state ( $n=N$ ) without becoming trapped in an aggregate. In the theory of kinetic processes, this amounts to the calculation of a committor. Following Onsager<sup>1</sup>, the vector of probabilities  $f_n$  ( $n=1$  to  $N-1$  with  $f_N=1$  by definition) to reach the fully assembled state ( $n=N$ ) satisfies the following equation in vector-matrix form,  $\mathbf{f}^T \mathbf{M} = (0 \ 0 \ \dots \ 0 \ p_{N-1})$ , where  $T$  indicates

the transpose and  $\mathbf{M}$  is a tridiagonal matrix of size  $(N-1) \times (N-1)$  with elements  $M_{n,n-1} = -p_{n-1}$ ,  $M_{n-1,n} = -q_{n-1}$ ,  $M_{n,n} = 1$  and all other elements equal to zero. Here, we are interested in the committor  $f_1$  that defines the probability of a nascent complex reaching the correctly assembled state rather than aggregating. We have an explicit expression for this probability of success in terms of the matrix inverse:  $f_1 = p_{N-1} [\mathbf{M}^{-1}]_{N-1,1}$ . For tridiagonal matrices such as  $\mathbf{M}$ , inversion is relatively straightforward and computationally efficient.

To gain some insight, we consider in the following the case where the probabilities of assembly and fragmentation are constant,  $p_n = p$  and  $q_n = q$  with  $r = 1 - p - q \geq 0$  the aggregation probability at each assembly step except for  $n=1$ , where this probability is  $1 - p$ . Then one obtains a compact expression for the matrix inverse. The probability of successful assembly of an  $N$ -component complex becomes  $f_1 = p^{N-1} / \left[ (\sqrt{pq})^{N-1} U_{N-1} \left( \frac{1}{\sqrt{4pq}} \right) \right]$  where  $U_n$  is the  $n$ -th order Chebyshev polynomial of the second kind. **Supplementary Fig. 1b** shows the calculated overall assembly success as a function of the success rate  $p$  at each step for a complex of  $N=10$  components for different aggregation propensities  $r$ . We find that only for large  $p$  one achieves significant overall yields, even at mild aggregation propensity. To further this point, we consider the case of  $pq \ll 1$ , i.e.,  $p$  or  $q$  or both are small. Then we have  $f_1 \approx p^{N-1} / [1 - (N-2)pq]$ . That is, the success of assembly decreases exponentially with the number  $N$  of assembly components, as illustrated in **Supplementary Fig. 1c** for  $p=0.7$  and  $q=0.2$  with a mild aggregation probability of  $r=0.1$ .

We obtain an analogous result for the more complicated model with  $p_n$  and  $q_n$  depending on  $n$ . In the limit where fragmentation can be ignored,  $q_n=0$ , the probability of assembly success is given by the product of probabilities of successful progression at each step,  $f_1 = \prod_{n=1}^{N-1} p_n$ . If not all intermediates progress to the assembled state,  $p_n < 1$ , then the overall assembly success tends to be small for large assemblies,  $N \gg 2$ . Ensuring  $p_n \approx 1$  requires dedicated assembly strategies.

The above model indicates at least three possible routes to increase the fraction of successful assemblies: (1) to suppress the binding of non-specific partners that compete with specific binding and can result in aggregation; (2) to reduce the number of steps  $N$  in the assembly process; and (3) to accelerate the on-rate of components that lead to productive growth of the assembly.

### **Improving assembly success by capturing aggregation-prone intermediates**

Co-translational assembly can increase the overall assembly yield by capturing aggregation-prone intermediates and advancing the assembly to the next step. To illustrate this point, we assume the nearly ideal case that all but  $k$  steps in the linear assembly pathway (**Supplementary Fig. 1a**) proceed forward with probability  $p_n = 1$ . In the remaining  $k$  steps, we assume a probability  $r$  to aggregate. The overall yield then decreases as  $f_1 = (1 - r)^k$ , i.e., exponentially in  $k$ . Co-translational binding to otherwise aggregation-prone intermediates reduces  $r$  and enhances the yield.

### **Improving assembly success by hierarchical assembly**

The overall success can also be improved by reducing the number of steps below  $N-1$  at more or less fixed probability  $p$  of assembly success at each step. The reason is that the overall probability of success scales as  $p^{N-1}$  and thus decreases exponentially with  $N$ . Hierarchical assembly is a very effective way of cutting down the number of steps in the assembly process. For simplicity, we consider a complex formed of  $N$  components with  $N = 2^m$  a power of 2. In a first step, we assemble in parallel components 1-2, 3-4, ..., and  $(N-1)-N$ . In the next step, we assemble these pairwise to 1-4, 5-8, etc. Continued in this way, we arrive at the complete assembly after only  $m = \log_2 N$  steps. If each of these hierarchical steps has a success probability  $p$ , then the overall success rate is  $p^m$  instead of  $p^{N-1}$ . For small assemblies, this may be an insignificant gain. However, for large assemblies such as the nuclear pore complex, hierarchical assembly in particular of its identical sub-assemblies in a symmetric structure should significantly increase the assembly success, in particular in combination with co-translational assembly of the sub-complexes.

### **Improving assembly success by retaining assembly partners**

Co-translational assembly can also enhance the on-rate of a newly synthesized component to a partial complex retained in the vicinity of the ribosome. The effect is particularly strong if the nascent protein remains tethered to the ribosome, and the ribosome and the assembling complex are co-localized. Such tethering substantially enhances the effective local concentration and ensures incorporation into the growing assembly even if the affinity is low. We can quantify this effect using the quasi-harmonic approximation for the on-rate in chemical force microscopy<sup>2</sup>. Given an effectively harmonic tether of spring constant  $k_L$

holding the binding partners in spatial proximity, the effective concentration is  $\left(\frac{k_L}{2\pi k_B T}\right)^{3/2}$  in molecules per volume. For a molecular tether of  $m$  residues, we have approximately  $^3 \frac{k_L}{k_B T} \approx m^{-1} 15.75/\text{nm}^2$ . For a tether of 100 amino acids, the effective concentration becomes about 6.6 mM. At this highly effective concentration and the resulting fast on-rate, a newly arriving component readily outcompetes incorrect factors that have low affinity but jointly may be abundant in the cell.

## Supplementary Tables

**Supplementary Table 1:** TaqMan probes used for RIP-qPCR experiments.

| Gene          | TaqMan Probe Name | Fluorophore | Supplier           |
|---------------|-------------------|-------------|--------------------|
| <i>act1</i>   | Sc04120488_s1     | FAM-MGB     | Applied Biosystems |
| <i>seh1</i>   | Sc04122707_s1     | FAM-MGB     | Applied Biosystems |
| <i>nup85</i>  | Sc04138225_s1     | FAM-MGB     | Applied Biosystems |
| <i>nsp1</i>   | Sc04135209_s1     | FAM-MGB     | Applied Biosystems |
| <i>nup49</i>  | Sc04123659_s1     | FAM-MGB     | Applied Biosystems |
| <i>nup57</i>  | Sc04126036_s1     | FAM-MGB     | Applied Biosystems |
| <i>nic96</i>  | Sc04120807_s1     | FAM-MGB     | Applied Biosystems |
| <i>nup145</i> | Sc04122572_s1     | FAM-MGB     | Applied Biosystems |
| <i>sec31</i>  | Sc04108310_s1     | FAM-MGB     | Applied Biosystems |
| <i>sec13</i>  | Sc04147734_s1     | FAM-MGB     | Applied Biosystems |
| <i>nup82</i>  | Sc04135552_s1     | FAM-MGB     | Applied Biosystems |
| <i>nup159</i> | Sc04133316_s1     | FAM-MGB     | Applied Biosystems |
| <i>nup116</i> | Sc04153403_s1     | FAM-MGB     | Applied Biosystems |
| <i>nup100</i> | Sc04140578_s1     | FAM-MGB     | Applied Biosystems |
| <i>nup53</i>  | Sc04154666_s1     | FAM-MGB     | Applied Biosystems |
| <i>nup170</i> | Sc04099596_s1     | FAM-MGB     | Applied Biosystems |
| <i>nup157</i> | Sc04118666_s1     | FAM-MGB     | Applied Biosystems |
| <i>nup192</i> | Sc04135187_s1     | FAM-MGB     | Applied Biosystems |
| <i>gle2</i>   | Sc04118682_s1     | FAM-MGB     | Applied Biosystems |
| <i>sea4</i>   | Sc04100019_s1     | FAM-MGB     | Applied Biosystems |
| <i>mtc5</i>   | Sc04110895_s1     | FAM-MGB     | Applied Biosystems |
| <i>fas1</i>   | Sc04141945_s1     | FAM-MGB     | Applied Biosystems |
| <i>fas2</i>   | Sc04172723_s1     | FAM-MGB     | Applied Biosystems |

**Supplementary Table 2:** Synthetic RNAs (adapted from references<sup>4,5</sup>) were used as markers for size selection of ribosome footprints. The RNA was fluorophore-labeled with 6-FAM on the 5' end.

|        | Sequence (5' – 3')                       | Supplier |
|--------|------------------------------------------|----------|
| 26-mer | 6-FAM/AUGUUAGGGUAUACAGGGUAAUGCGA         | IDT      |
| 28-mer | 6-FAM/AGACAGUCCAGAAAUCACAGUCCUCUUU       | IDT      |
| 30-mer | 6-FAM/AUGUACACUAGGGUAUACAGGGUAAUCAAC     | IDT      |
| 34-mer | 6-FAM/AUGUACACUAGGGUAUACAGGGUAAUCAACGCGA | IDT      |

**Supplementary Table 3:** List of antibodies used in this study.

|                                        | Supplier                  | Identifier                                 |
|----------------------------------------|---------------------------|--------------------------------------------|
| Recombinant Anti-Strep tag II antibody | abcam                     | EPR12666; ab180957<br>Lot. No. GR3212622-7 |
| Anti-rabbit IgG, HRP-linked Antibody   | Jackson<br>ImmunoResearch |                                            |

**Supplementary Table 4:** Yeast strains and corresponding genotypes used in this study.

| <b>Strain Name</b>                                                                 | <b>Genotype</b>                                                                           | <b>Source</b>         |
|------------------------------------------------------------------------------------|-------------------------------------------------------------------------------------------|-----------------------|
| BY4741 (wt)                                                                        | <i>MATa his3Δ1 leu2Δ0 met15Δ0, ura3Δ0</i>                                                 | provided by Patil lab |
| Nic96-StrepII                                                                      | (BY4741) <i>nic96-strepII</i>                                                             | this study            |
| Nsp1-StrepII                                                                       | (BY4741) <i>nsp1-strepII</i>                                                              | this study            |
| Nup49-StrepII                                                                      | (BY4741) <i>nup49-strepII</i>                                                             | this study            |
| Nup57-StrepII                                                                      | (BY4741) <i>nup57-strepII</i>                                                             | this study            |
| Nup53-StrepII                                                                      | (BY4741) <i>nup53-strepII</i>                                                             | this study            |
| Nup192-StrepII                                                                     | (BY4741) <i>nup192-strepII</i>                                                            | this study            |
| Nup157-StrepII                                                                     | (BY4741) <i>nup157-strepII</i>                                                            | this study            |
| Nup170-StrepII                                                                     | (BY4741) <i>nup170-strepII</i>                                                            | this study            |
| Nup100-StrepII                                                                     | (BY4741) <i>nup100-strepII</i>                                                            | this study            |
| Nup116-StrepII                                                                     | (BY4741) <i>nup116-strepII</i>                                                            | this study            |
| Gle2-StrepII                                                                       | (BY4741) <i>gle2-strepII</i>                                                              | this study            |
| Seh1-StrepII                                                                       | (BY4741) <i>seh1-strepII</i>                                                              | this study            |
| Nup85-StrepII                                                                      | (BY4741) <i>nup85strepII</i>                                                              | this study            |
| Sec13-StrepII                                                                      | (BY4741) <i>sec13-strepII</i>                                                             | this study            |
| Sec31-StrepII                                                                      | (BY4741) <i>sec31-strepII</i>                                                             | this study            |
| Nup145C-StrepII                                                                    | (BY4741) <i>nup145-strepII</i>                                                            | this study            |
| Mtc5-StrepII                                                                       | (BY4741) <i>mtc5-strepII</i>                                                              | this study            |
| Nup82-StrepII                                                                      | (BY4741) <i>nup82-strepII</i>                                                             | this study            |
| Nup159-StrepII                                                                     | (BY4741) <i>nup159-strepII</i>                                                            | this study            |
| Fas1-StrepII                                                                       | (BY4741) <i>fas1-strepII</i>                                                              | this study            |
| Fas2-StrepII                                                                       | (BY4741) <i>fas2-strepII</i>                                                              | this study            |
| Nsp1-Strep (Nup57Δαβ)                                                              | (BY4741) <i>nsp1-strepII, nup57(Δ925-1062)</i>                                            | this study            |
| Nsp1-StrepII ( <i>pRS316 empty</i> )                                               | (BY4741) <i>nsp1-strepII, pRS316(tef1p-MCS-cyc1)</i>                                      | this study            |
| Nsp1-StrepII ( <i>nup57::MX4</i> )                                                 | (BY4741) <i>nsp1-strepII, nup57::Mx4, pRS316(tef1p-nup57-cyc1)</i>                        | this study            |
| Nsp1-Strep (Nup57 CCS1 <sub>Nup82(FL)</sub> , <i>pRS316(ptef1-nup57-cyc1)</i> )    | (BY4741) <i>nsp1-strepII, nup57(855-1272Δnup82(1564-1830), pRS316(ptef1-nup57-cyc1))</i>  | this study            |
| Nsp1-Strep (Nup57 CCS1 <sub>Nup82(trunc)</sub> , <i>pRS316(ptef1-nup57-cyc1)</i> ) | (BY4741) <i>nsp1-strepII, nup57(1063-1272Δnup82(1633-1830), pRS316(ptef1-nup57-cyc1))</i> | this study            |
| Nsp1-Strep (Nup57 CCS1 <sub>Nup82(FL)</sub> )                                      | (BY4741) <i>nsp1-strepII, nup57(855-1272Δnup82(1564-1830))</i>                            | this study            |
| Nsp1-Strep (Nup57 CCS1 <sub>Nup82(trunc)</sub> )                                   | (BY4741) <i>nsp1-strepII, nup57(1063-1272Δnup82(1633-1830))</i>                           | this study            |

## Supplementary Figures

**a**

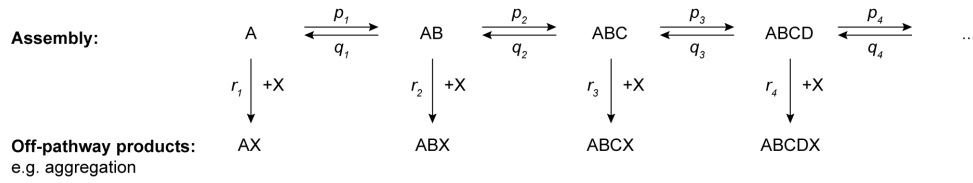

**b**

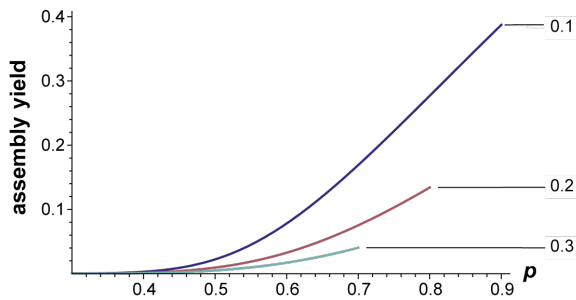

**c**

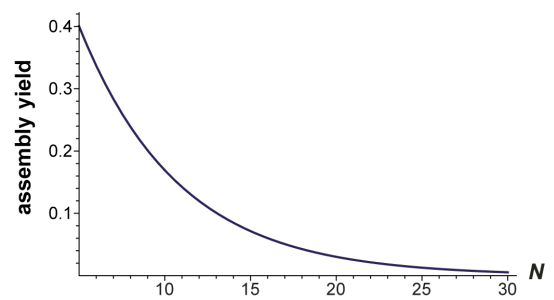

**Supplementary Figure 1: Theoretical benefits of co-translational assembly. a**, In a linear scheme of co-translational assembly, we assume probabilities  $p_n$  and  $q_{n-1}$  in steady state for the assembly at step  $n$  to grow and shrink, respectively. We further assume that incorrect incorporations of X occur with the probability  $r_n$  at step  $n$  and lead to the removal of material from the assembly process. **b**, Assembly yield  $f_1$  as a function of success rate  $p_n=p$  at each assembly step for a complex with  $N=10$  components. Curves are shown for aggregation probabilities  $r_n=r$  of 0.1, 0.2 and 0.3. **c**, Assembly yield  $f_1$  as a function of complex size  $N$  for a success rate  $p=0.7$  at each step, a fragmentation probability  $q=0.2$  (except  $q_1=0$ ), and an aggregation probability  $r=0.1$  (except  $r_1=1-p=0.3$ ).



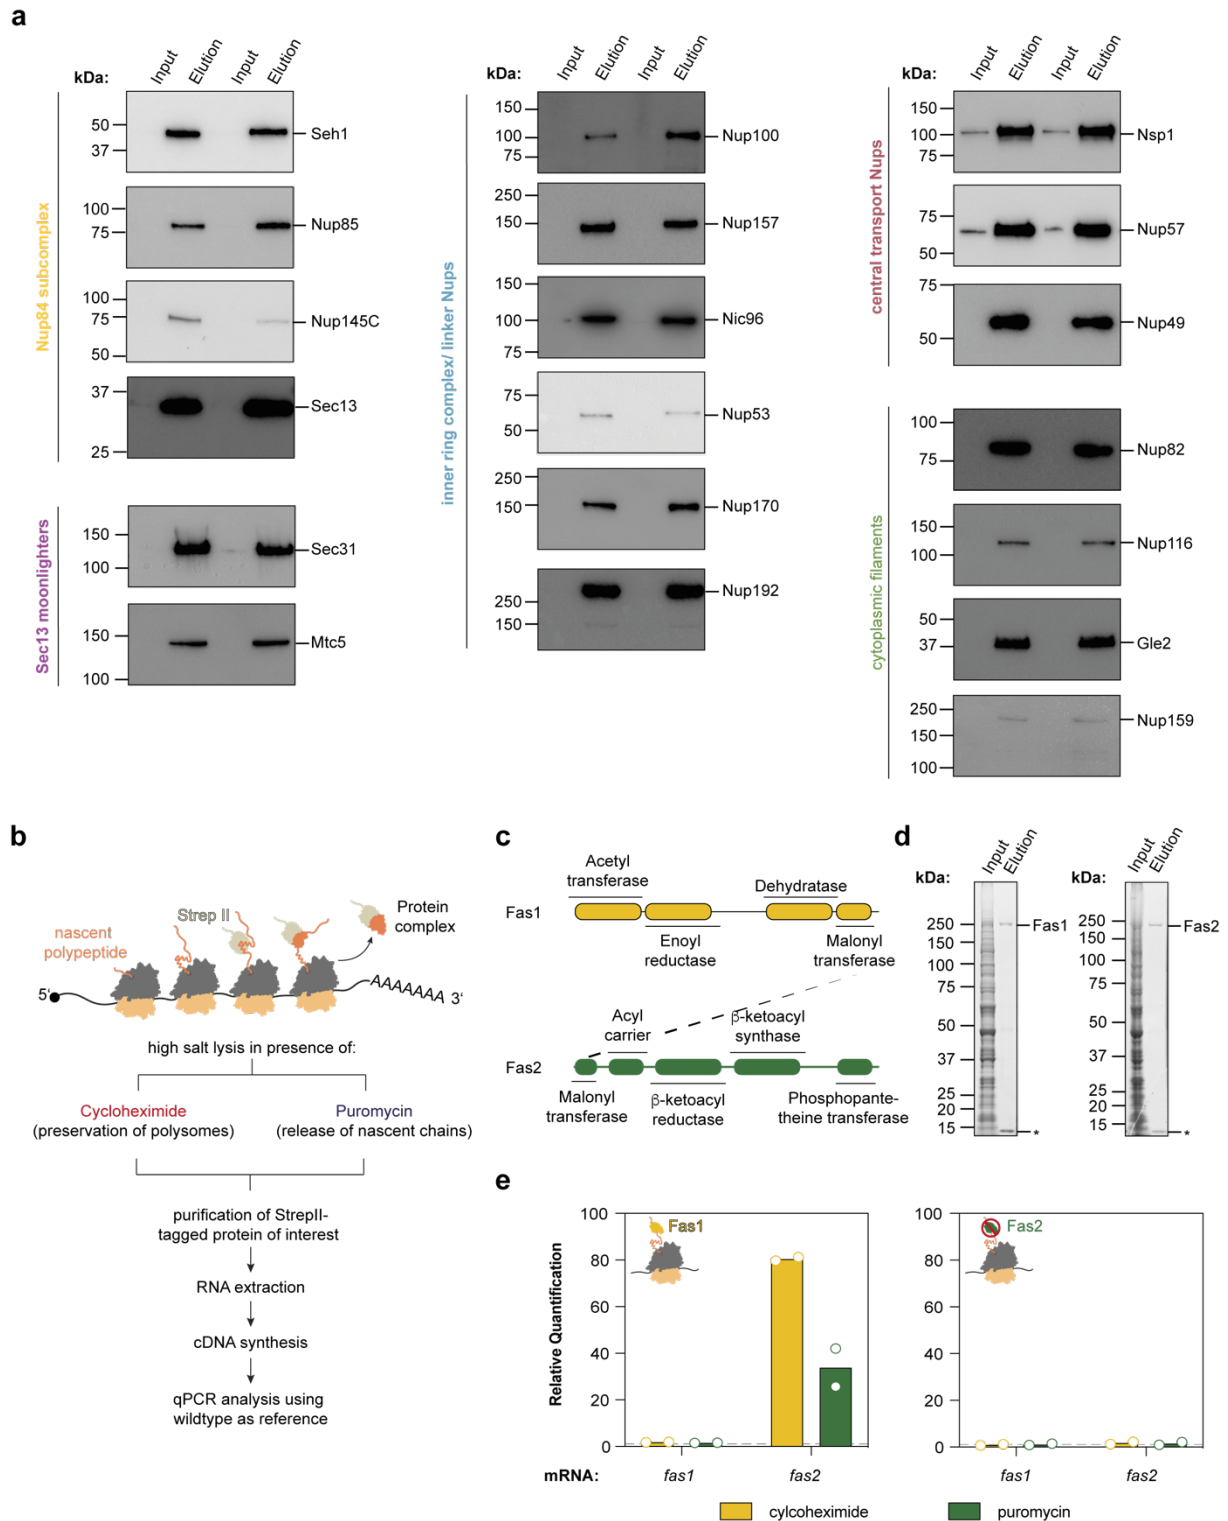

**Supplementary Figure 2: RIP-qPCR analysis.** **a**, Representative Western Blots of the bait purifications. Proteins were detected using a primary anti-Strep antibody coupled to a secondary anti-rabbit antibody conjugated to horse radish peroxidase (HRP). **b**, Work flow of our RIP-qPCR experiment. **c**, Domain diagram of Fas1 and Fas2. The C-terminal malonyl transferase domain of Fas1 engages co-translationally with the N-terminal malonyl transferase domain of Fas2<sup>6</sup>. **d**, Coomassie-stained SDS-PAGE of Fas1 and Fas2 that were affinity purified from crude lysate. Streptactin contamination is indicated with an asterisk (\*). **e**, RIP-qPCR experiment of Fas1 and Fas2 showing that Fas1 could enrich for *fas2*-mRNA in a puromycin-sensitive manner. Bar plots show the mean.  $n=2$  for Fas1-StrepII (*fas1*- and *fas2*-

mRNA) and Fas2-StrepII (*fas1*- and *fas2*-mRNA). Source data for panel **a**, **d** and **e**, are provided as a Source Data file.

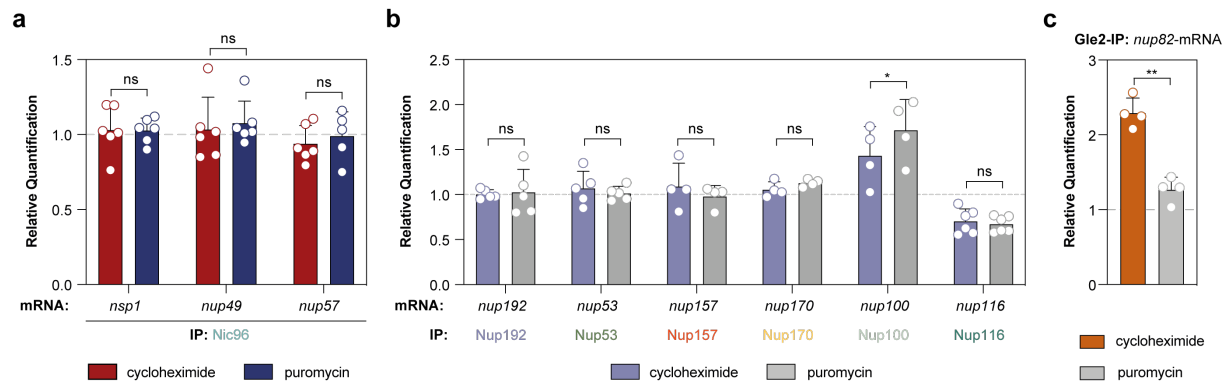

**Supplementary Figure 3: Extension of RIP-qPCR data.** **a**, RIP-qPCRs with affinity purified Nic96 show that Nic96 does not enrich for any of the CTN-mRNAs.  $n=6$  biologically independent samples for Nic96-StrepII (*nsp1*-, *nup49*- and *nup57*-mRNA). **b**, RIP-qPCR experiments for the indicated Nups highlight that they do not or only weakly enrich for their own mRNA.  $n=6$  biologically independent samples for Nup116-StrepII (*nup116*-mRNA);  $n=5$  biologically independent samples for Nup192-StrepII (*nup192*-mRNA) and Nup53-StrepII (*nup53*-mRNA) and  $n=4$  biologically independent samples for Nup157-StrepII (*nup157*-mRNA) and Nup170-StrepII (*nup170*-mRNA) and Nup100-StrepII (*nup100*-mRNA).  $*p=0.0118$  for Nup100-StrepII (*nup100*-mRNA). **c**, RIP-qPCR experiment of a Gle2-IP against *nup82*-mRNA revealing a co-translational engagement of Gle2 with nascent Nup82.  $n=4$  biologically independent samples for Gle2-StrepII (*nup82*-mRNA).  $**p=0.006$  for Gle2-StrepII (*nup82*-mRNA). Bar plots show mean  $\pm$  SD. ns  $p>0.05$ , \*  $p<0.05$ , \*\*  $p<0.01$  (Two-sided, paired t-test). Source data for the RIP-qPCRs are provided as a Source Data file. IP: immunoprecipitation.

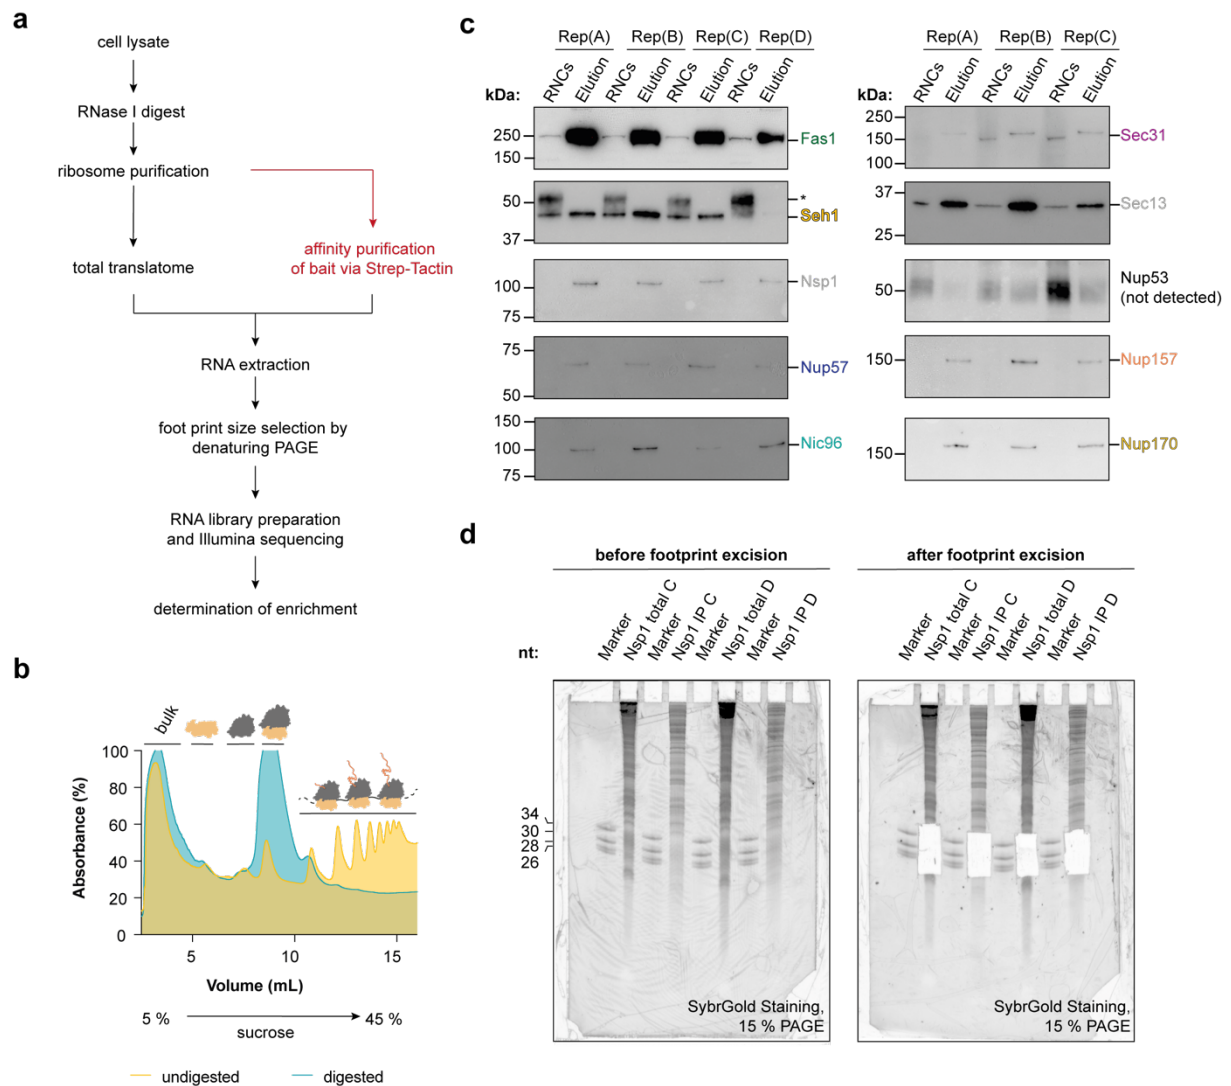

**Supplementary Figure 4: Preparation of selective ribosome profiling experiment.** **a**, Schematic illustration of a selective ribosome profiling experiment. **b**, Representative polysome profiling experiment of RNase I treated cell lysates. While, undigested cell lysate contains polysomes, 20 U/A of RNase I converts the majority of polysomes into monosomes (80S ribosomes) and an RNase I resistant disome peak. **c**, Western Blot analysis of the Fas1 and tested proteins of interest shows enrichment of most proteins after affinity purification in comparison to the input consisting of ribosome-nascent chain complexes (RNCs). Proteins were detected by an anti-StrepII antibody coupled to an anti-rabbit antibody conjugated to HRP. Asterisk (\*) marks an unspecific band. Membranes show each of the biologically independent replicates for the SeRP experiments. **d**, Representative denaturing PAGE gel as used for the size selection of the ribosome protected footprints by gel excision. A marker with synthesized 26-, 28-, 30- and 34-mers was loaded as reference. RNA was visualized by SybrGold. Source data for panel **b**, and **c**, are provided as a Source Data file. Rep: replicate; RNC: ribosome-nascent chain complex; PAGE: polyacrylamide gel electrophoresis, IP: immunoprecipitation.

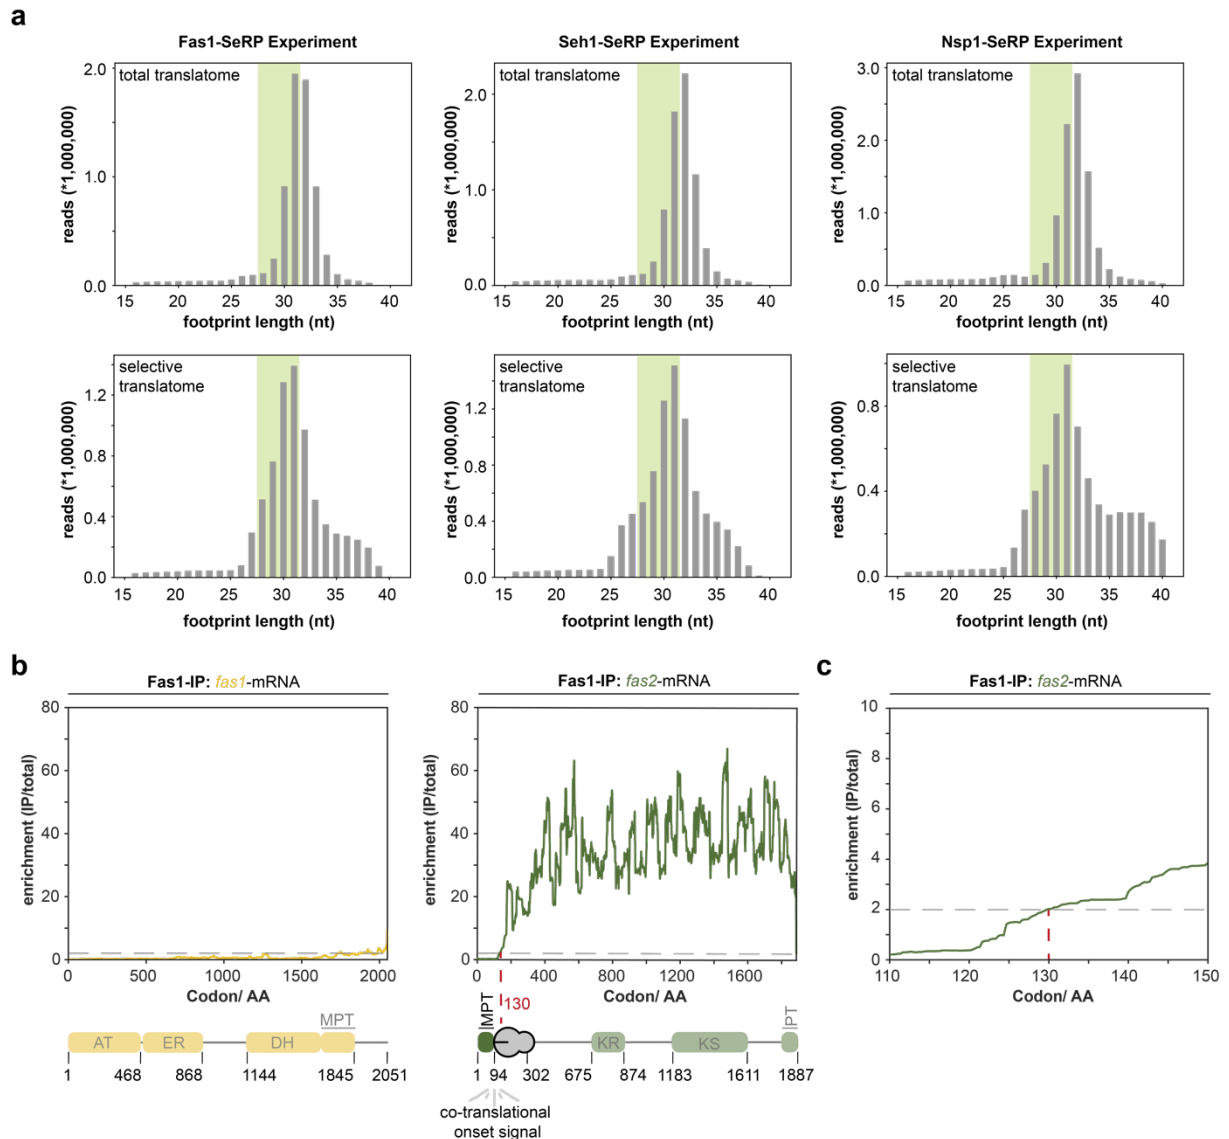

**Supplementary Figure 5: Fas1-SeRP experiments as a benchmark. a**, Ribosome footprints of adequate length (reflecting the protected fragments) are retrieved from sequencing data. Representative footprints for Fas1, Seh1- and Nsp1-SeRP experiments are shown. Footprints recovered from IPs for respective baits were derived from the total translome. The green area (26-32 nt) highlights the footprints used for further processing. Each size distribution plot shows one of the four biological replicates. **b**, and **c**, Positive control recapitulates the co-translational interactions of Fas1 with the nascent chain of Fas2 with an interaction onset after 130 aa. Graph was generated from four biologically independent replicates. SeRP: Selective ribosome profiling, IP: immunoprecipitation; AA: amino acids; AT: acetyl transferase; ER: enoyl reductase; DH: dehydratase; MPT: malonyl palmitoyl transferase; KR: beta-ketoacyl reductase; KS: beta-ketoacyl synthase; PT: phosphopantetheine transferase.

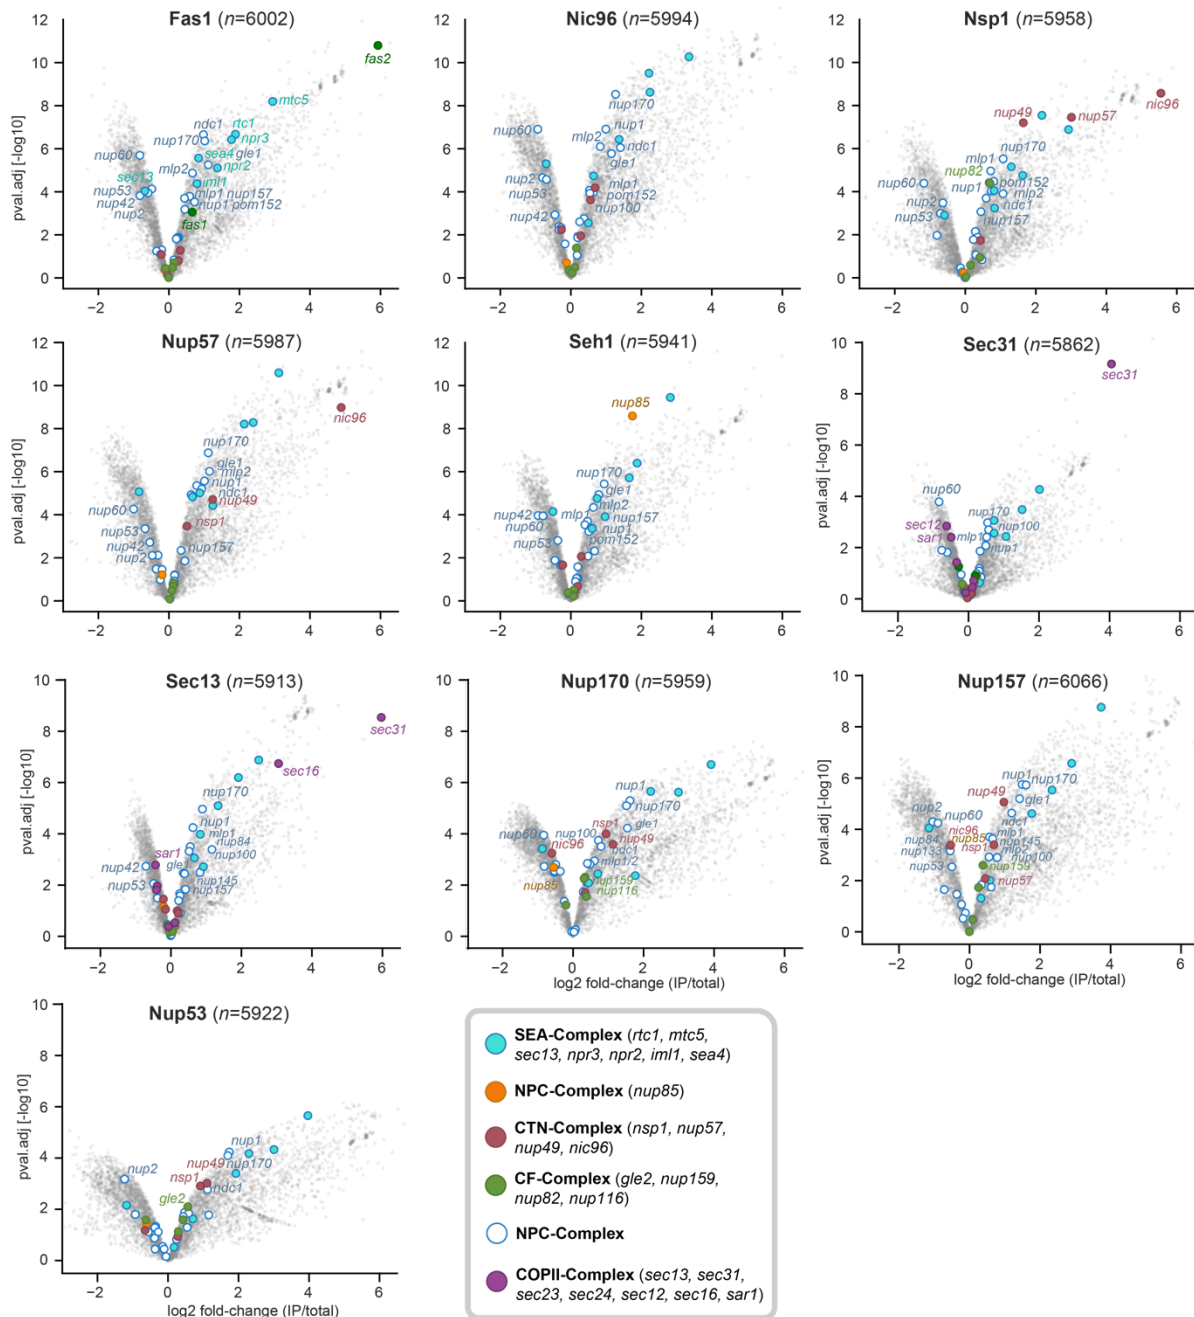

**Supplementary Figure 6: Volcano plots of selective ribosome profiling data.** Volcano plots depict fold change (IP/total) and their respective adjusted p-value using the Benjamini-Hochberg method. Complex components of interest are highlighted. The Limma analysis was performed with n=4 biologically independent samples for Seh1-StrepII, Nic96-StrepII, Fas1-StrepII and Nup57-StrepII; n=3 biologically independent samples for Sec13-StrepII, Sec31-StrepII and Nup157-StrepII and n=2 biologically independent samples for Nup170-StrepII and Nup53-StrepII. Source data are provided in the Source Data file. NPC: nuclear pore complex, CTN: central transport Nups, CF: cytoplasmic filaments.

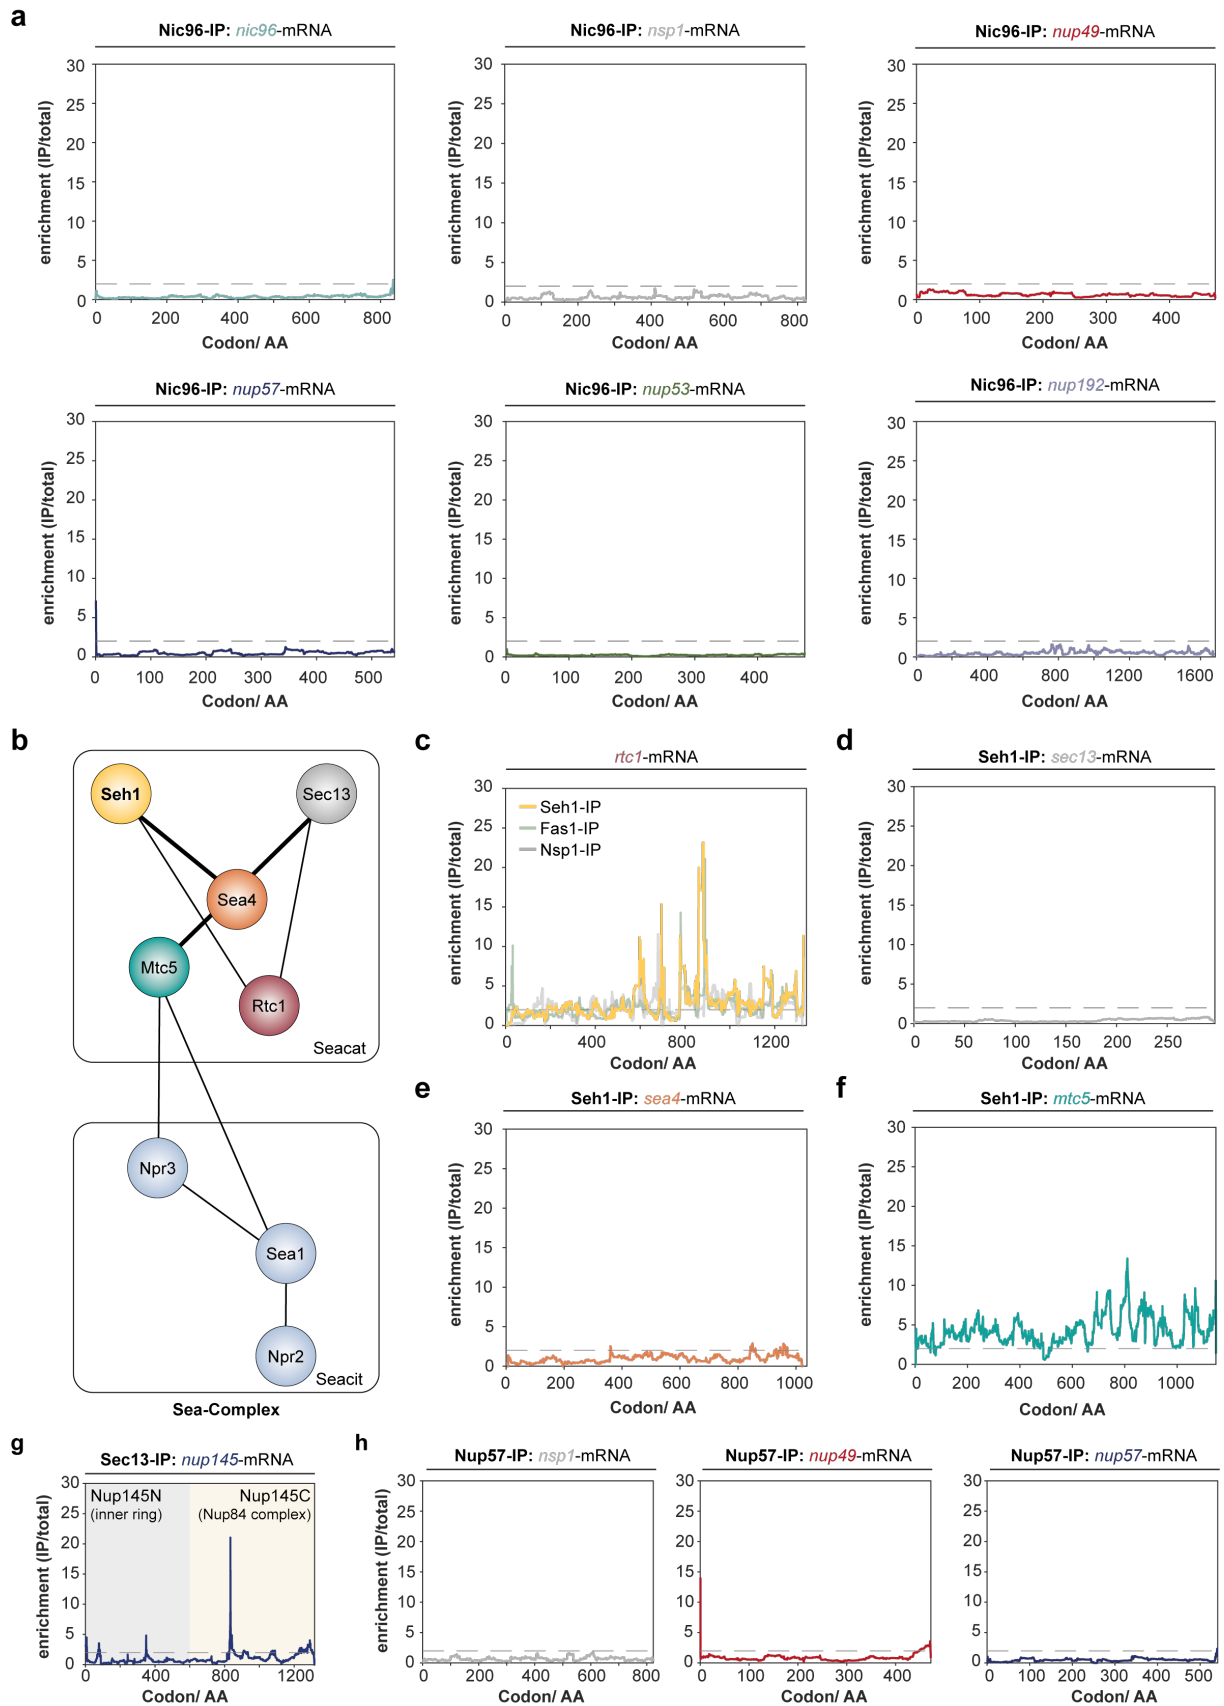

(Figure legend on the next page)

**Supplementary Figure 7: Negative SeRP data.** **a**, SeRP from Nic96 affinity purifications does not detect possible nascent chain interactions within any of the shown ORFs. **b**, Scheme of the Sea-complex in *S. cerevisiae*. Lines connecting proteins represent interactions previously identified by crosslinking mass spectrometry<sup>7</sup>. **c-f**, SeRP data within the Sea-complex. **c**, Overlay of SeRP footprints within the *rtc1*-ORF from affinity purifications of Fas1, Nsp1 and Seh1. Although an enrichment over the total translome is apparent, it is not specific for Seh1. **d-f**, SeRP experiments with affinity purified Seh1. Footprints within the *sec13*-, *sea4*-, and *mtc5*-ORFs are shown. **f**, Analysis of the *mtc5*-footprints shows elevated signal but no clear onset (see also **Supplementary Fig. 6 and 7c**). **g**, SeRP of a Sec13-IP indicates only very subtle changes of footprint enrichment after codon 800 within the *nup145*-ORF. **h**, SeRP with affinity purified Nup57 does not detect any enrichment of ribosome footprints for other CTN components. n=4 biologically independent samples for Seh1-StrepII, Nic96-StrepII, Fas1-StrepII and Nup57-StrepII and n=3 biologically independent samples for Sec13-StrepII. IP: immunoprecipitation, AA: amino acids.



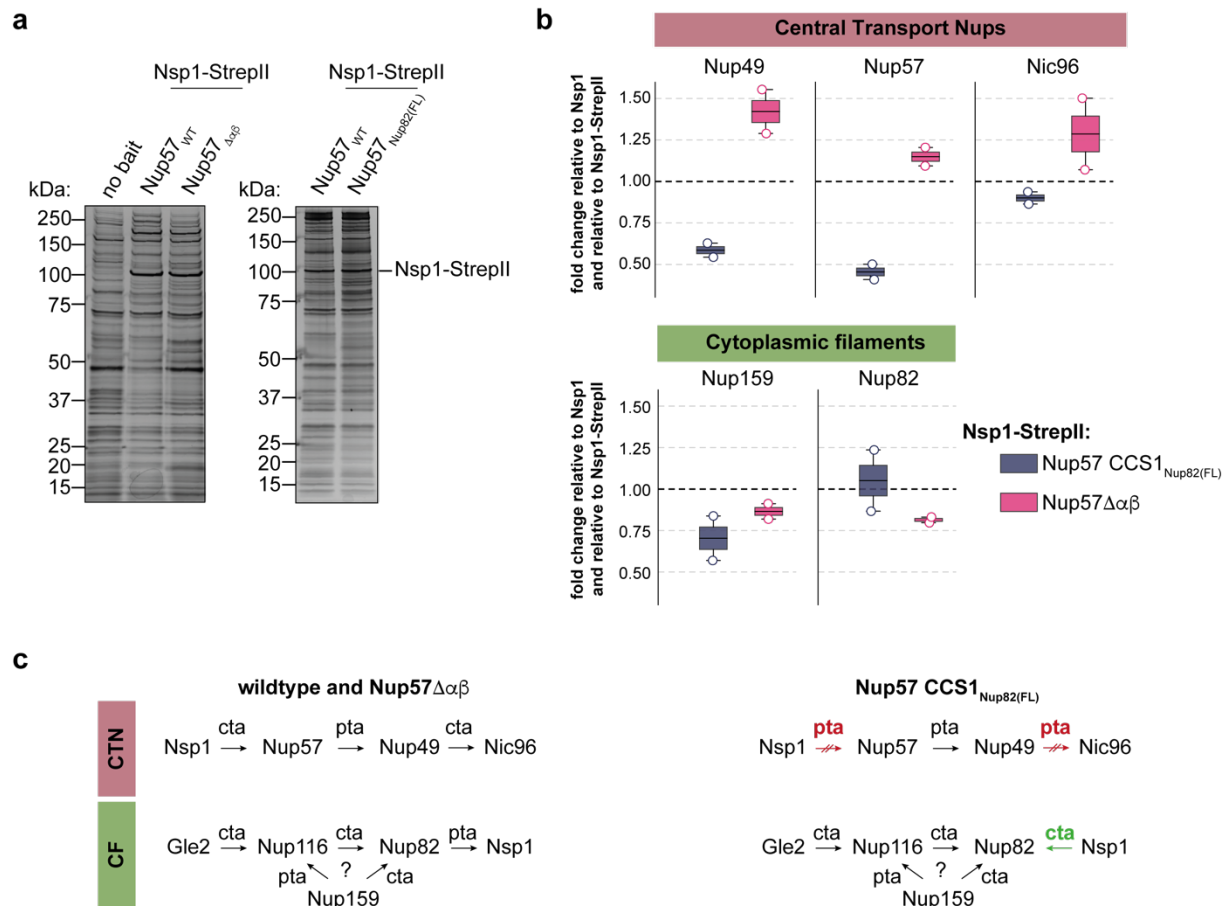

**Supplementary Figure 8: Extended data for Nsp1 pull downs from Nup57 wildtype and mutant background.** **a**, Representative silver-stained gels of Nsp1-StrepII pull downs revealing an enrichment of Nsp1. **b**, Protein intensity of proteins within the CTN (*top*) and CF (*bottom*) normalized to Nsp1. Nup49 and Nup57 show increased abundances upon deletion of the alpha-beta-domain of Nup57 while replacing the CCS1 of Nup57 with that of Nup82 resulted in a reduction of Nup57 and Nup49. Within the cytoplasmic filaments, Nup159 but not Nup82 shows a decrease in co-elution from Nsp1 pull down among both mutants. The box plots were derived from  $n=2$  biologically independent samples. The black dashed line indicates protein enrichment of a Nsp1 pull down within wildtype background. Box plots show median with top and bottom reflecting the interquartile range. Whiskers represent 1.5 times the interquartile range. **c**, Summary model of CTN and CF perturbation assays by altering the alpha-beta and CCS1 domain of Nup57. While deletion of the alpha-beta domain in Nup57 did not cause any changes in the co-translational network, CCS1 substitution with CCS1 of Nup82 abolished the co-translational assembly with Nup57 and Nic96 and co-translational assembly with Nup82 was detected instead. Source data for panels **a**, and **b**, are provided in the Source Data file. CF: cytoplasmic filament, CTN: central transport Nups, cta: co-translational assembly, pta: post-translational assembly.

## Supplementary References

1. Onsager, L. Initial recombination of ions. *Phys. Rev.* **54**, 554–557 (1938).
2. Müller, D. J. *et al.* Atomic Force Microscopy-Based Force Spectroscopy and Multiparametric Imaging of Biomolecular and Cellular Systems. *Chem. Rev.* **121**, 11701–11725 (2021).
3. Best, R. B. & Hummer, G. Protein folding kinetics under force from molecular simulation. *J. Am. Chem. Soc.* **130**, 3706–3707 (2008).
4. McGlincy, N. J. & Ingolia, N. T. Transcriptome-wide measurement of translation by ribosome profiling. *Methods* **126**, 112–129 (2017).
5. Welz, R. Entwicklung eines Twinribozyms für die RNA-Reparatur. 1–141 (2003).
6. Shiber, A. *et al.* Cotranslational assembly of protein complexes in eukaryotes revealed by ribosome profiling. *Nature* **561**, 268–272 (2018).
7. Algret, R. *et al.* Molecular architecture and function of the SEA complex, a modulator of the TORC1 pathway. *Mol. Cell. Proteomics* **13**, 2855–2870 (2014).
